# Supplementary figures and images for: RETRACTED ARTICLE: Ranking candidate genes of esophageal squamous cell carcinomas based on differentially expressed genes and the topological properties of the co-expression network
Source: Springer Nature journal article supplement (doi:10.1186/s40001-014-0052-x), 2014-10-28

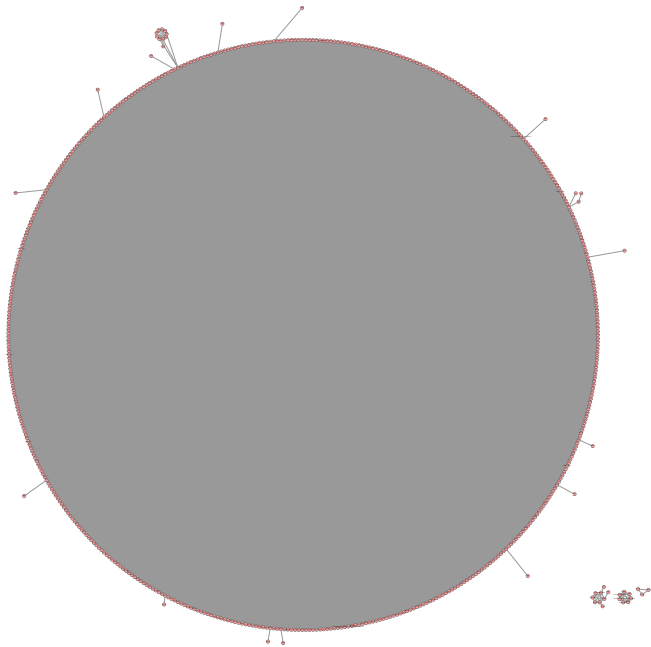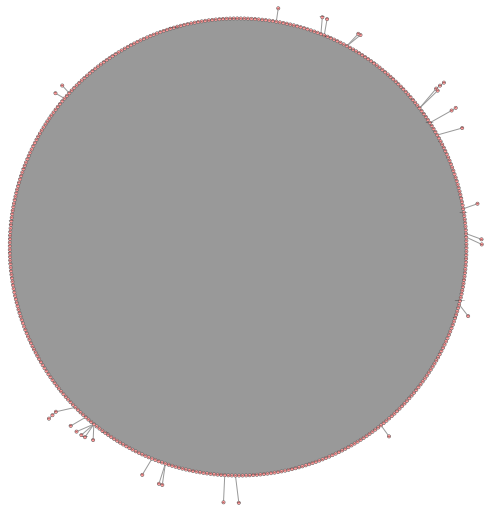

Supplement: MOESM1 [file 9788230]
